# Supplementary material
Source: PubMed Central journal article supplement (PMC3781932)
Supplement: NIHMS483099-supplement-1.pdf [file NIHMS483099-supplement-1.pdf]

## Supplemental Material

$Ca^{2+}$  signaling in human induced pluripotent stem cell-derived cardiomyocytes (iPS-CM) from normal and catecholaminergic polymorphic ventricular tachycardia (CPVT)-afflicted subjects.

by

Zhang, X-H., Haviland, S., Wei, H., Šarić, T., Fatima A., Hescheler, J., Cleemann, L., & Morad, M.

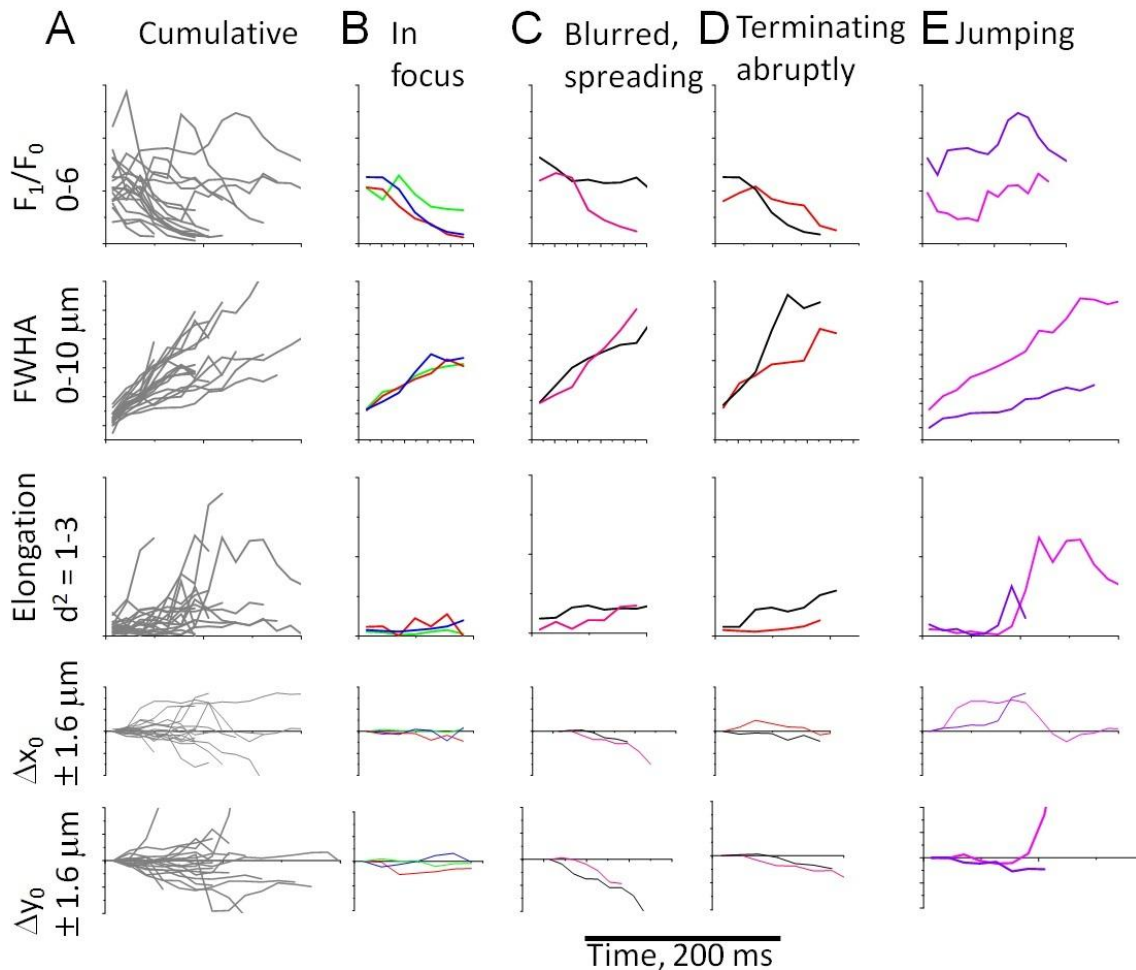

**Supplemental Figure 1.** Unitary properties of  $Ca^{2+}$  sparks. From top to bottom each panel illustrates the time course of local  $Ca^{2+}$  releases in terms of their amplitude ( $F_1/F_0$ ), full-width-at-half-amplitude (FWHA), “elliptical elongation” ( $d^2$ ), and shifts in location ( $\Delta x_0$  and  $\Delta y_0$ ). A: Distribution of measurements. The individual traces are interpreted as follows: B: Three ordinary  $Ca^{2+}$  sparks (red, blue, and green) with a well-defined center of release within the evanescent

field of illumination. C: Diffuse  $\text{Ca}^{2+}$  releases suggesting  $\text{Ca}^{2+}$  release outside the evanescent field or asymmetric spread. D: Abrupt termination of long-lasting  $\text{Ca}^{2+}$  sparks. E: Local  $\text{Ca}^{2+}$  releases with rapidly shifting centers.

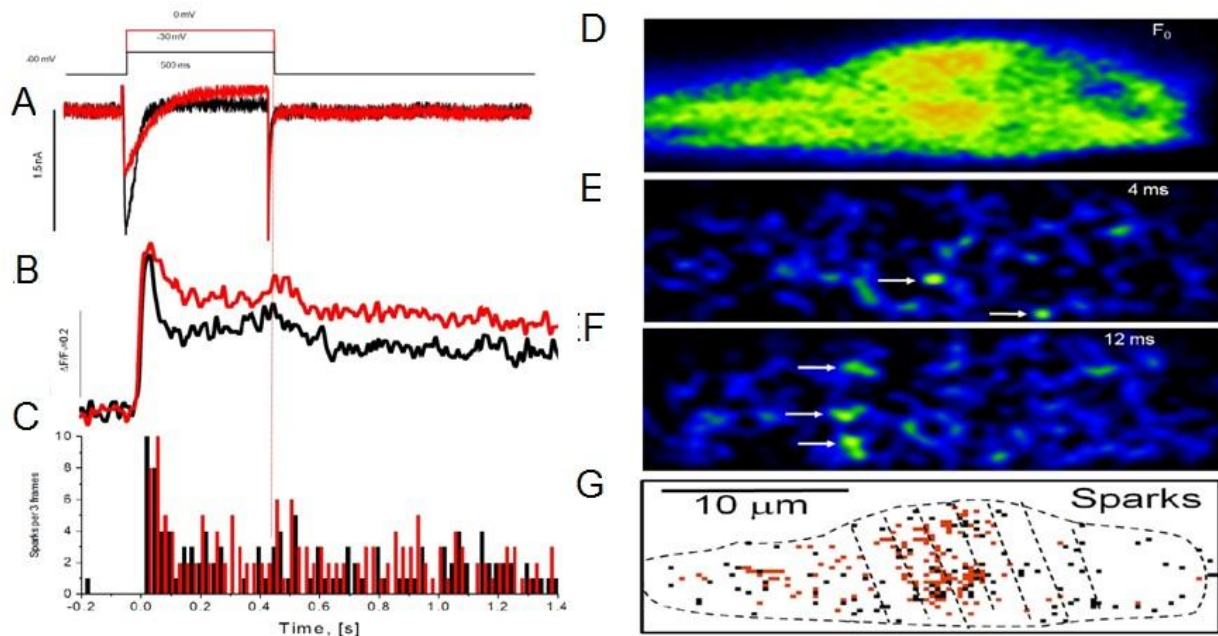

**Supplemental Figure 2.** Sarcomeric  $\text{Ca}^{2+}$  release in voltage-clamped elongated iPS-CM. A subset of iPS-CM were elongated and showed some indication of sarcomeric striping as found in adult ventricular cardiomyocytes <sup>2</sup>. A: Membrane currents measured with depolarizing pulses from -60 mV to -30 mV (black) and 0 mV (red). B: Cellular transients of  $\text{Ca}^{2+}$ -dependent Fluo-4 fluorescence ( $\Delta F/F_0$ ). C: Frequency of  $\text{Ca}^{2+}$ -sparks binned per 3 frames of 4.17 ms. D: Average fluorescence intensity ( $F_0$ ). E & F Sample frames showing  $\text{Ca}^{2+}$  sparks 4 (E) and 12 ms (F) after depolarization from -60 to 0 mV (arrows). G: Distribution of  $\text{Ca}^{2+}$  sparks. The dashed lines suggest the presence of a faint sarcomeric pattern. Confocal measurement at 240 Hz.

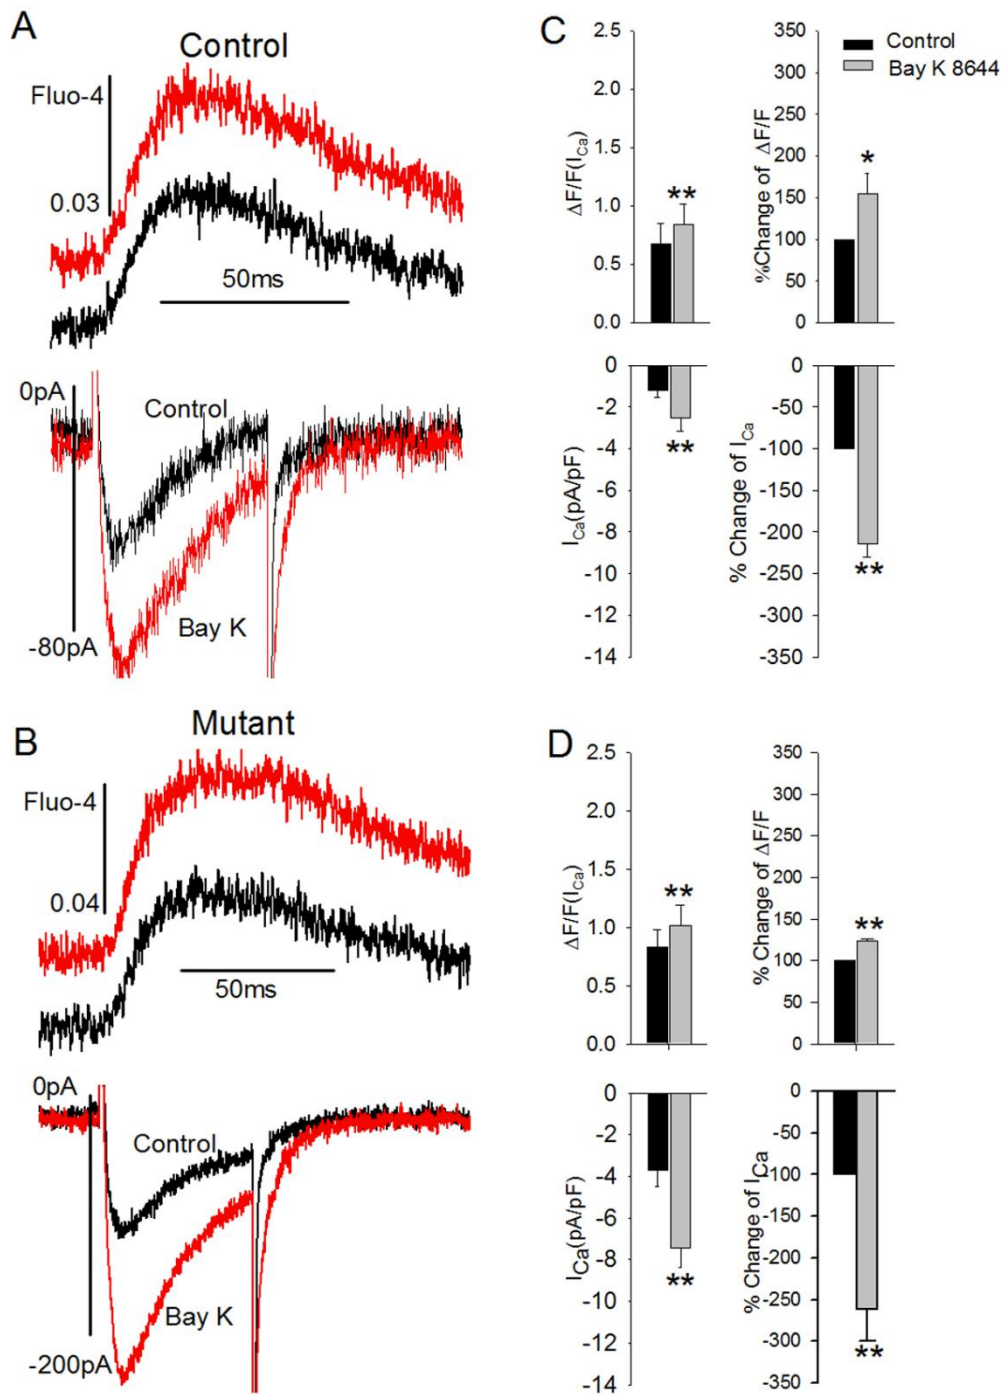

**Supplemental Figure 3.** Effects of the  $Ca^{2+}$  channel agonist Bay K8644 on  $I_{Ca}$  and  $Ca_i$ -transients in control and mutant iPS-CM. A and B: representative  $I_{Ca}$  traces and the corresponding  $Ca^{2+}$  fluorescence in control (a and b) and mutant (c and d) iPS-CM before and after exposure to Bay K. The voltage-clamped cells were depolarized to 0 mV from a holding potential of -40 mV. C and D: Average values of peak  $I_{Ca}$  and fluorescence in each group before and after Bay K.
